# Supplementary material for: Research on the Consumption Trend, Nutritional Value, Biological Activity Evaluation, and Sensory Properties of Mini Fruits and Vegetables
Source: MDPI journal article supplement (doi:10.3390/foods10122966), 2021-12-02
Supplement: s1 [file s1]

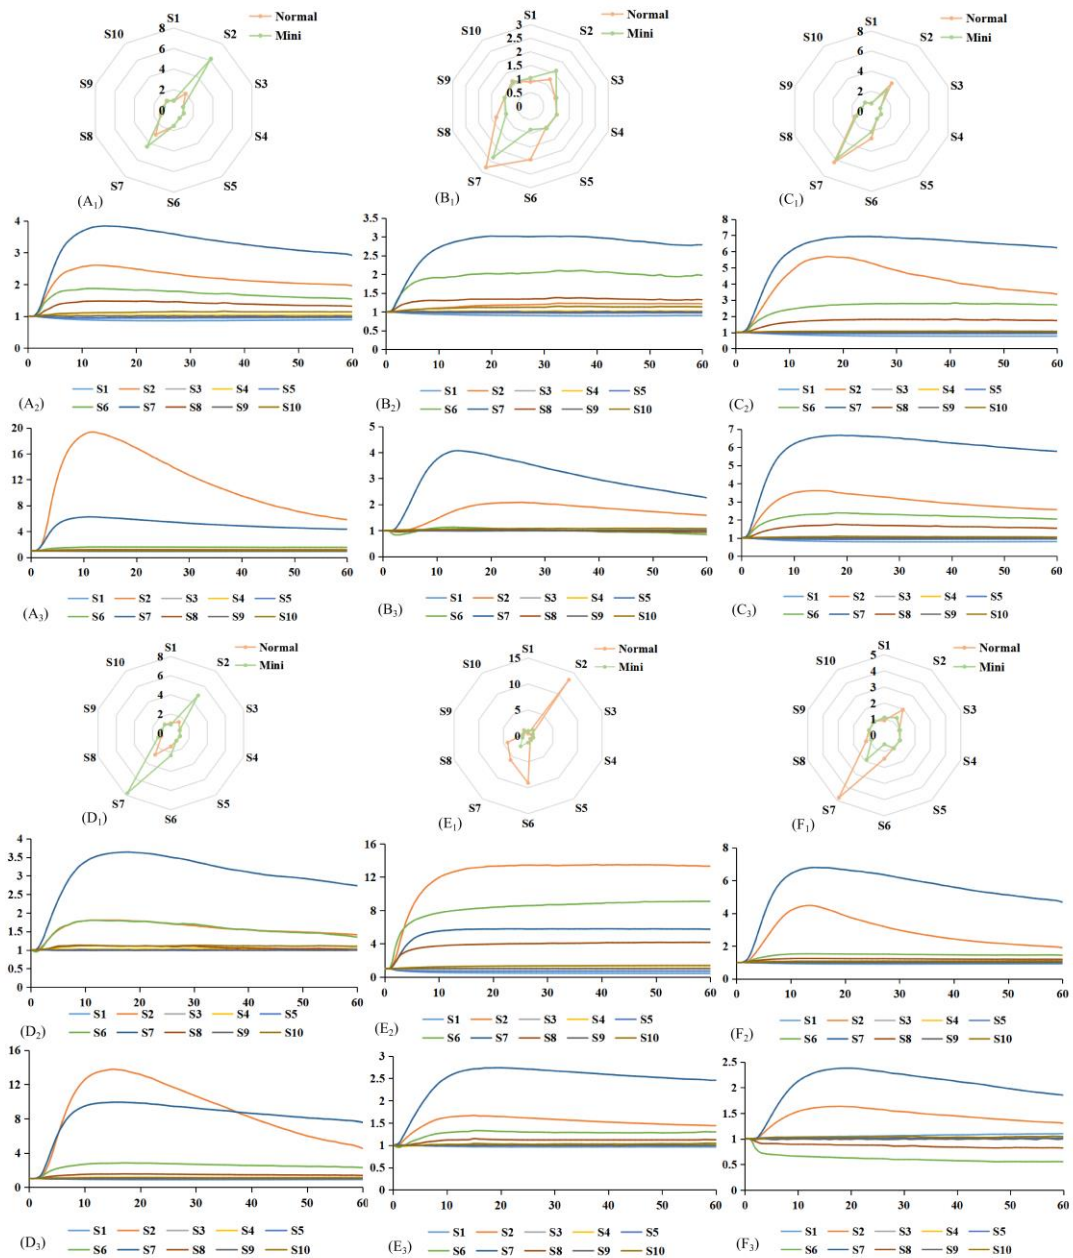

**Figure S1. E-nose assay of MFV and NFV. (A<sub>1</sub>-F<sub>1</sub>) Radar charts of E-nose response data; (A<sub>2</sub>-F<sub>2</sub>) Sensor responses recorded using ten sensors of the E-nose for NFV; (A<sub>3</sub>-F<sub>3</sub>) Sensor responses recorded using ten sensors of the E-nose for MFV. (A. Watermelon; B. Pineapple; C. Pumpkin; D. Cabbage; E. Maize; F. Carrot.)**

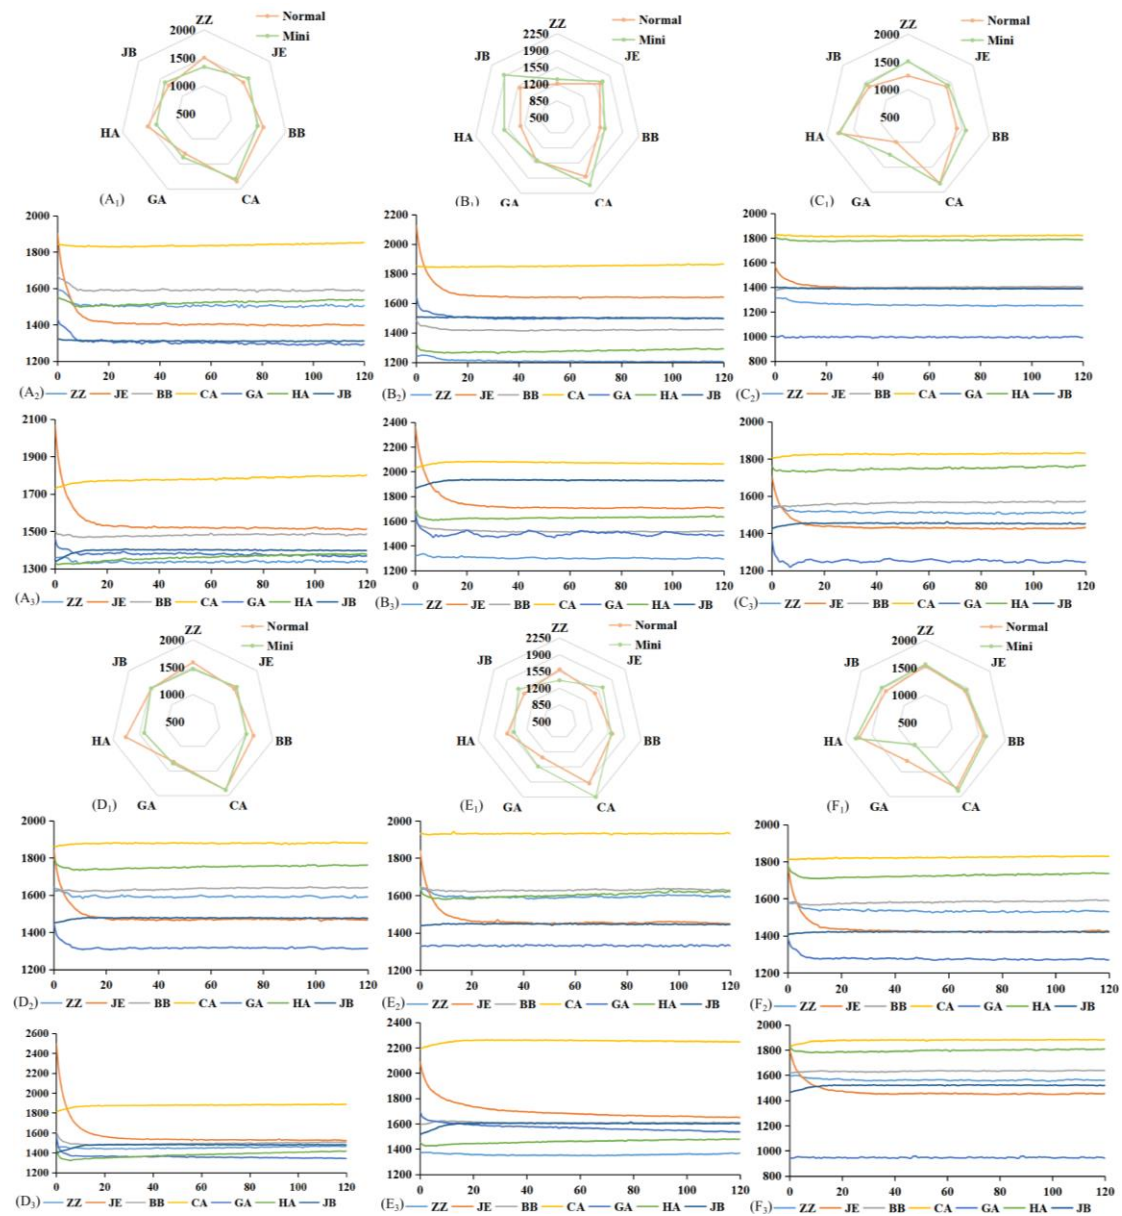

Figure S2. E-tongue assay of MFV and NFV. (A<sub>1</sub>-F<sub>1</sub>) Radar charts of E-tongue response data; (A<sub>2</sub>-F<sub>2</sub>) Sensor responses recorded using ten sensors of the E-tongue for NFV; (A<sub>3</sub>-F<sub>3</sub>) Sensor responses recorded using ten sensors of the E-tongue for MFV. (A. Watermelon; B. Pineapple; C. Pumpkin; D. Cabbage; E. Maize; F. Carrot.)

**Table S1. Detection thresholds of each sensor of electronic tongue.**

| Basic taste | Sensor threshold (mol/L) |                  |                  |                  |                  |                  |                  |
|-------------|--------------------------|------------------|------------------|------------------|------------------|------------------|------------------|
|             | ZZ                       | JE               | BB               | CA               | GA               | HA               | JB               |
| Sour        | 10 <sup>-7</sup>         | 10 <sup>-7</sup> | 10 <sup>-7</sup> | 10 <sup>-7</sup> | 10 <sup>-7</sup> | 10 <sup>-7</sup> | 10 <sup>-7</sup> |
| Sweet       | 10 <sup>-7</sup>         | 10 <sup>-4</sup> | 10 <sup>-7</sup> | 10 <sup>-7</sup> | 10 <sup>-4</sup> | 10 <sup>-4</sup> | 10 <sup>-4</sup> |
| Salty       | 10 <sup>-6</sup>         | 10 <sup>-5</sup> | 10 <sup>-6</sup> | 10 <sup>-6</sup> | 10 <sup>-4</sup> | 10 <sup>-4</sup> | 10 <sup>-5</sup> |
| Bitter      | 10 <sup>-5</sup>         | 10 <sup>-4</sup> | 10 <sup>-4</sup> | 10 <sup>-5</sup> | 10 <sup>-4</sup> | 10 <sup>-4</sup> | 10 <sup>-4</sup> |
| Fresh       | 10 <sup>-5</sup>         | 10 <sup>-4</sup> | 10 <sup>-4</sup> | 10 <sup>-5</sup> | 10 <sup>-4</sup> | 10 <sup>-4</sup> | 10 <sup>-4</sup> |
